# Supplementary material for: Electrolyte-gated transistors based on phenyl-C61-butyric acid methyl ester (PCBM) films: bridging redox properties, charge carrier transport and device performance
Source: Royal Society of Chemistry journal article supplement (doi:10.1039/c8cc03090a), 2018-01-01
Supplement: c8cc03090a1.pdf [file c8cc03090a1.pdf]

### ***Electronic Supplementary Information***

#### **Electrolyte-gated transistors based on phenyl-C61-butyric acid methyl ester (PCBM) films: bridging redox properties, charge carrier transport and device performance**

**Tian Lan,<sup>a</sup> Francesca Soavi,<sup>b</sup> Massimo Marcaccio,<sup>b</sup> Pierre-Louis Brunner,<sup>c</sup> Jonathan Sayago<sup>d\*</sup>  
and Clara Santato<sup>a\*</sup>**

<sup>a</sup>. Polytechnique Montréal, Département de Génie physique, Montréal, Québec H3C 3A7, Canada, e-mail : clara.santato@polymtl.ca

<sup>b</sup>. Department of Chemistry "Giacomo Ciamician", Università di Bologna, 40126, Italy

<sup>c</sup>. Solaris Chem Inc., 598 Chaline St., Saint-Lazare, Quebec, J7T 3E8, Canada

<sup>d</sup>. Instituto de Energías Renovables, Universidad Nacional Autónoma de México, Temixco, Morelos 62588, Mexico, e-mail: jjsayago@ier.unam.mx

### **Experimental**

SiO<sub>2</sub>/Si substrates were photolithographically patterned with source and drain electrodes (Au 40 nm-thick on Ti adhesion film, 4 nm-thick) with interelectrode distance, *L*, of 10 μm and width, *W*, of 4 mm. A layer 1.6 μm-thick of Parylene C (Cookson Electronics, MW 500 kDa) was deposited on the patterned substrate and a rectangle of 1 mm × 5 mm, centered on the transistor channel, was etched away through photolithography and reactive ion etching. Prior to deposition of the PCBM semiconducting films, the substrates were cleaned with sequential steps of 5 min in isopropyl alcohol, 10 min in acetone and 5 min in isopropyl alcohol in ultrasonic baths. PCBM solutions consisting of 5 mg PCBM (Solaris Chem Inc) in 1 ml chlorobenzene stirred overnight in a N<sub>2</sub> glove box at room temperature were prepared. PCBM thin film were deposited by drop-cast on the substrates and set on a hot plate at 50 °C for 2 h in N<sub>2</sub> glove box (< 5 ppm O<sub>2</sub>, H<sub>2</sub>O). The typical thickness of the films measured with profilometer was 380 nm. [EMIM][TFSI] or [PYR<sub>14</sub>][TFSI]

(IoLiTec, >99%) ionic liquids were purified at 100 °C,  $10^{-5}$  Torr overnight. The ionic liquids were contained in a Durapore<sup>®</sup> membrane, 4 mm × 9 mm-sized, 125 µm-thick, laminated on top of the PCBM channel. The gate electrodes consisted of high surface area carbon paper (Spectracarb 2050), 6 mm × 3 mm, 170 µm thick, coated with an ink of activated carbon (PICACTIF SUPERCAP BP10, Pica, 28 mg ml<sup>-1</sup>) and polyvinylidene fluoride (PVDF, KYNAR HSV900, 1.4 mg ml<sup>-1</sup>) binder, in N-methyl pyrrolidone (NMP, Fluka). The microfabrication process flow is shown in S1. Transistor electric characteristics were acquired employing an Agilent B1500A semiconductor parameter analyzer connected to a house-made micromanipulated electrical probe station. Electrochemical characterizations were measured in situ with a VersaSTAT 4 potentiostat. X-ray diffraction (XRD) spectra of the PCBM thin films was taken using Bruker D8 diffractometer equipped with a copper source for X-rays with a wavelength (Cu K<sub>α</sub>) of 1.54 Å. Scanning Electron Microscopy (SEM) images were taken in air, at room temperature on a Digital Instruments Dimension 3100 in tapping mode with Al-coated silicon cantilevers. 4M [Li][TFSI] (Sigma Aldrich, 99.95%) in tetraethylene glycol dimethyl ether (TEGDME) (Sigma Aldrich, ≥99%) was prepared stirring overnight in a N<sub>2</sub> glove box at room temperature.

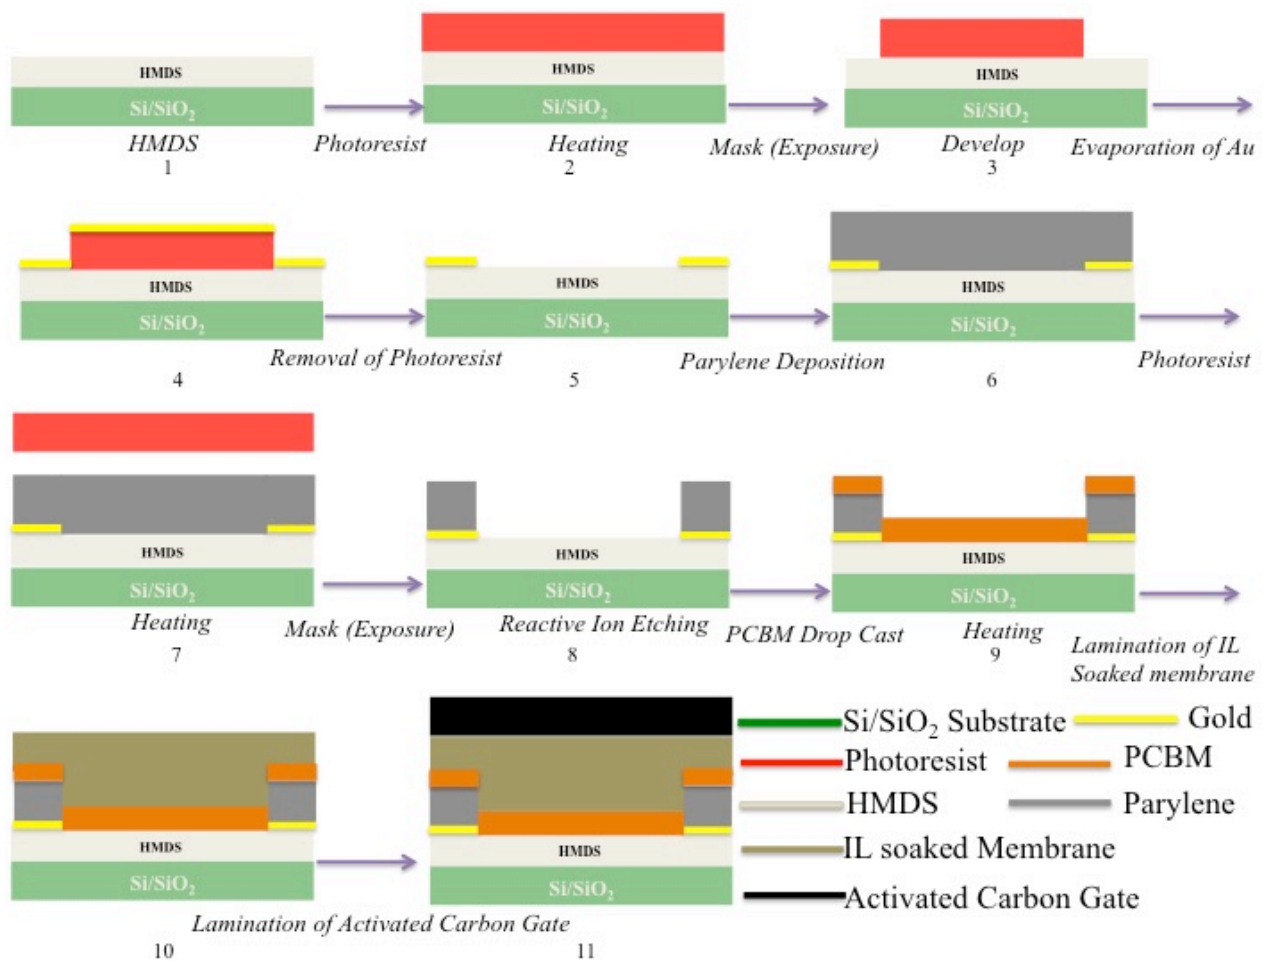

Fig. S1. Microfabrication process flow.

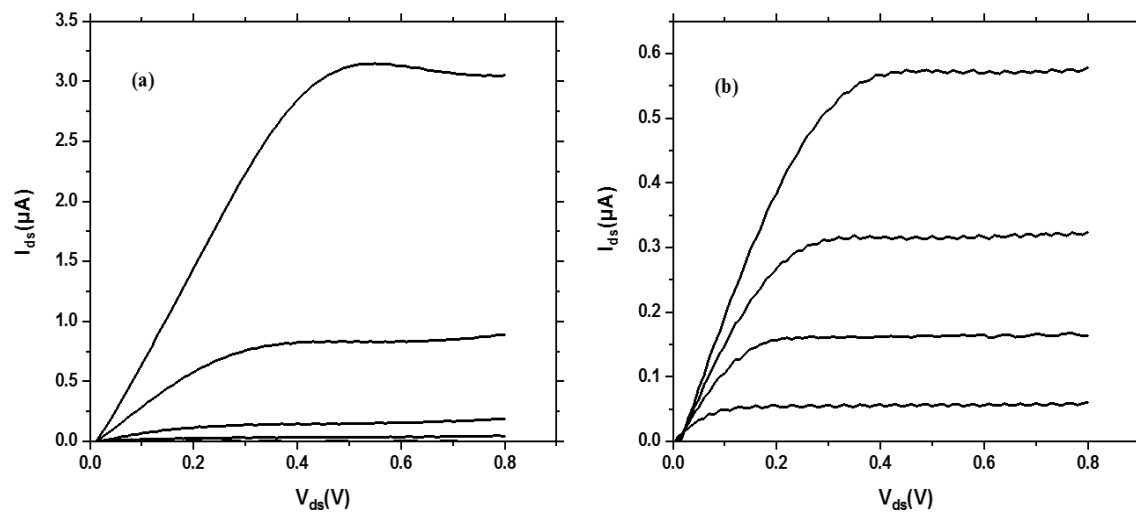

Fig. S2. Output characteristics for  $V_{gs} = 0, 0.8, 0.9, 1, 1.1$  V, at  $10 \text{ mVs}^{-1}$ , for (a) [EMIM][TFSI]- and (b) [PYR<sub>14</sub>][TFSI]- gated PCBM transistors.

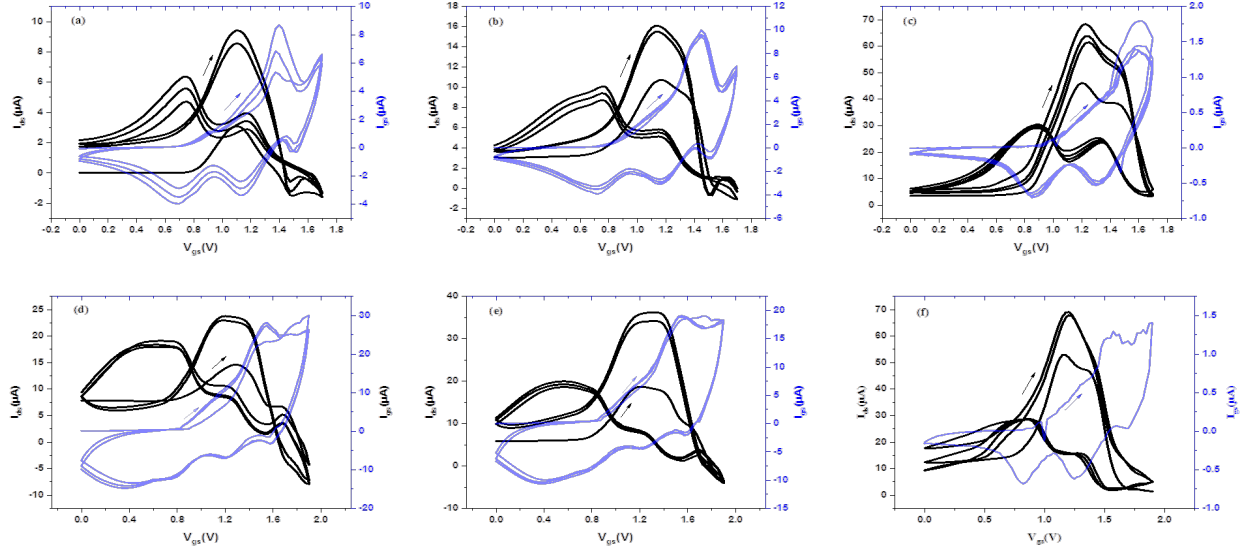

Fig. S3. Transfer characteristics obtained for increased values of  $V_{gs}$  for [EMIM][TFSI]-gated PCBM transistors. For (a) (b) (c) the interval is 0 V / 1.7 V. For (d) (e) (f) the interval is 0 V / 1.9 V.  $V_{gs}$  sweeping rates: (a) and (d)  $100 \text{ mVs}^{-1}$ , (b) and (e)  $50 \text{ mVs}^{-1}$ , (c) and (f)  $1 \text{ mVs}^{-1}$ . In Fig. S4 f only the 3<sup>rd</sup> cycle of the  $I_{gs}$  vs  $V_{gs}$  is reported due to the weak (and as such relatively noisy) values of  $I_{gs}$  measured for the 1<sup>st</sup> and 2<sup>nd</sup> cycles.

In [EMIM][TFSI], for  $V_{gs}$  up to 1.7 V, at  $100 \text{ mVs}^{-1}$ , during the 1<sup>st</sup> forward scan of the  $I_{ds}$  vs  $V_{gs}$  plots (three cycles are shown in Fig. S3a) one peak is observable, located at ca 1.1 V. A peak shoulder is observable at 1.45 V (a second peak, of weak intensity, is located at ca.1.6 V). The peak at ca 1.1 V is more intense during the 2<sup>nd</sup> and 3<sup>rd</sup> cycle, with respect to the 1<sup>st</sup> one. In the backward scan, two peaks are observable; the peak position shift towards lower potentials from the 1<sup>st</sup> to the 3<sup>rd</sup> cycle. The decrease of the rate from  $100 \text{ mVs}^{-1}$  to  $50 \text{ mVs}^{-1}$  and  $1 \text{ mVs}^{-1}$  leads to a clear increase of the transistor current, as expected. The position of the peak current slightly shifts to higher potentials with the decrease of scan rate.  $I_{gs}$  vs  $V_{gs}$  plots recorded at  $100 \text{ mVs}^{-1}$  and  $50 \text{ mVs}^{-1}$  (Fig. S3a and S3b) show, on the forward scan, one shoulder at ca 1 V and a peak at ca 1.375(1.475) V for 100(50)  $\text{mVs}^{-1}$ . There are three peaks in the  $I_{gs}$  vs  $V_{gs}$  backward scans at high sweeping rates whereas only two peaks are observable at  $1 \text{ mVs}^{-1}$ .  $I_{ds}$  vs  $V_{gs}$  and  $I_{gs}$  vs  $V_{gs}$  plots show comparable values of the current for  $100 \text{ mVs}^{-1}$  and  $50 \text{ mVs}^{-1}$  whereas  $I_{ds}$  has clearly higher values than  $I_{gs}$  at  $1 \text{ mVs}^{-1}$ .

In [EMIM][TFSI], for  $V_{gs}$  up to 1.9 V, during the first forward scan of the  $I_{ds}$  vs  $V_{gs}$  plots (three cycles are shown in Fig. S3d) one peak is observable, located at ca 1.275 V, 1.225 V and 1.175 V from the highest to the lowest scan rate. One shoulder is found at ca. 1.425 V. The peaks are more intense during the 2<sup>nd</sup> and 3<sup>rd</sup> cycle, with respect to the 1<sup>st</sup> one. In the backward scan, three peaks are observable at 100 mV s<sup>-1</sup> and 50 mV s<sup>-1</sup>, whereas only two peaks are observable at 1 mVs<sup>-1</sup>.  $I_{gs}$  vs  $V_{gs}$  plots show, on the forward scan of the 1<sup>st</sup> cycle, one shoulder at ca 1.2 V, together with a peak at ca 1.55 V for 100 mVs<sup>-1</sup> and 50 mVs<sup>-1</sup>; on the other hand, three peaks are observable in the backward scans.  $I_{ds}$  vs  $V_{gs}$  and  $I_{gs}$  vs  $V_{gs}$  plots also show comparable values of the current for  $I_{ds}$  and  $I_{gs}$  for 100 mVs<sup>-1</sup> and 50 mVs<sup>-1</sup> whereas  $I_{ds}$  is clearly more intense than  $I_{gs}$  at 1 mVs<sup>-1</sup>. With respect to [PYR14][TFSI] (see main file),  $I_{ds}$  vs  $V_{gs}$  plots observed with PCBM films in [EMIM][TFSI] seems mainly governed by the ionic component of the transport, in agreement with the results observed for excursions of  $V_{gs}$  carried out up to  $V_{gs}$ =1.25 V; in [EMIM][TFSI], it is more challenging to extract information on the electronic contribution of the transport.

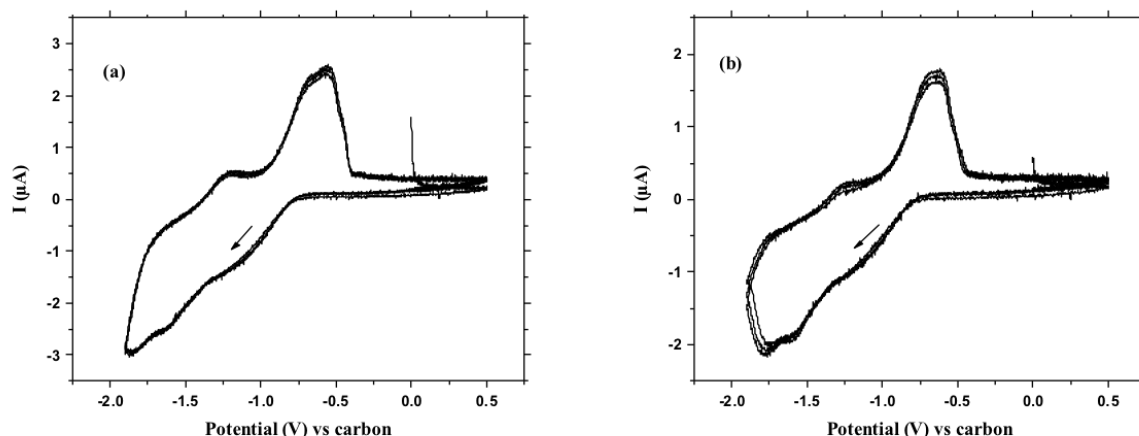

Fig. S4. Cyclic voltammograms in transistor configuration for PCBM films in 4 M [Li][TFSI] in tetraethylene glycol dimethyl-ether (TEGDME), with sweep rates of  $100 \text{ mV}\cdot\text{s}^{-1}$  (a) and  $50 \text{ mV}\cdot\text{s}^{-1}$  (b). The quasi reference electrode is made of high surface area activated carbon. Only the first three cycles are shown.

In 4 M [Li][TFSI] in TEGDME, PCBM electrodes feature, during the forward (cathodic) scan, two reduction processes located at around -1.0 V (shoulder) and -1.6 V (weak peak) at  $100 \text{ mV}\cdot\text{s}^{-1}$  whereas three reduction processes are observable at  $50 \text{ mV}\cdot\text{s}^{-1}$ , located at around -1.0 V (shoulder), -1.6 V (weak peak) and -1.75 V (peak) vs carbon. During the backward (anodic) scan, two anodic processes are observed: one located at around -1.25 V (weak peak), both for  $100 \text{ mV}\cdot\text{s}^{-1}$  and  $50 \text{ mV}\cdot\text{s}^{-1}$ , and another one located at around -0.5 V (peak with shoulder at -0.75 V) for  $100 \text{ mV}\cdot\text{s}^{-1}$  and -0.7 V (*flat* peak), for  $50 \text{ mV}\cdot\text{s}^{-1}$ . It is possible to observe that the voltammograms are less resolved than in the [EMIM][TFSI] and [PYR14][TFSI] cases.

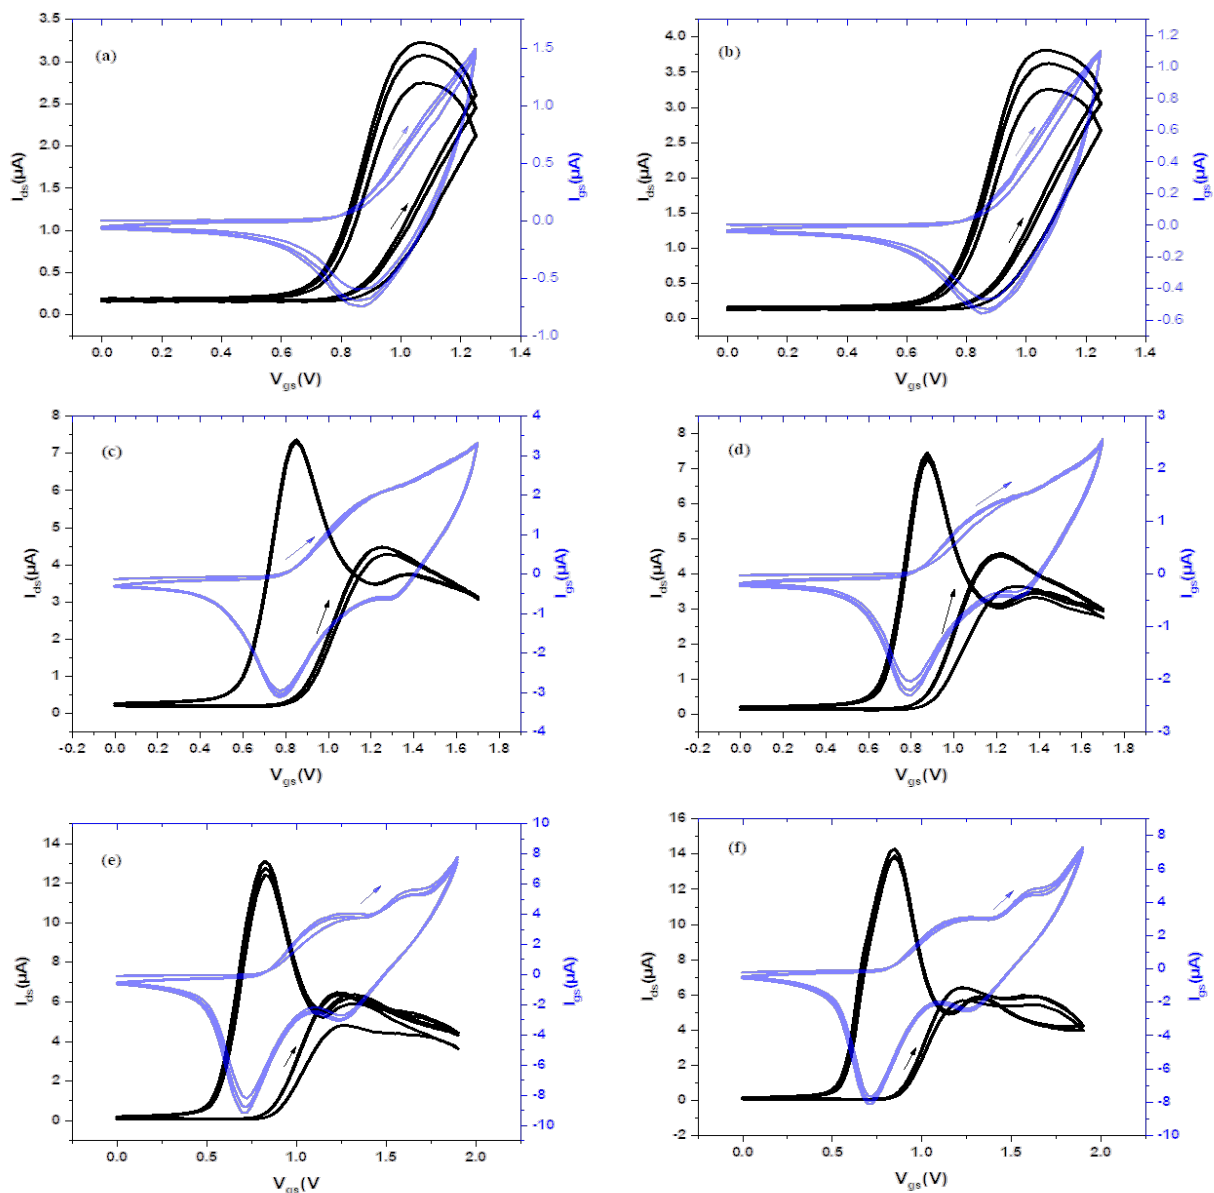

Fig. S5. Transfer characteristics obtained for PCBM transistors gated with 4 M [Li][TFSI] in TEGDME for increasing upper limits of  $V_{gs}$ . For (a) (b) the interval is 0 V/1.25 V. For (c) (d) the interval is 0 V/1.7 V. For (e) (f) the interval is 0 V/1.9 V.  $V_{gs}$  sweeping rates: (a), (c) and (e)  $100 \text{ mV}\cdot\text{s}^{-1}$ , (b), (d) and (f)  $50 \text{ mV}\cdot\text{s}^{-1}$ .

The linear transfer characteristics for 4 M [Li][TFSI] in TEGDME show that the transistor currents increase with the decrease of the sweep rate, as expected (see main text). For  $V_{gs}$  up to 1.25 V,  $I_{ds}$  vs  $V_{gs}$  plots at  $100 \text{ mV}\cdot\text{s}^{-1}$  and  $50 \text{ mV}\cdot\text{s}^{-1}$ , show one peak during the backward scan. For  $V_{gs}$  up to 1.7 and 1.9 V, during the forward scan, one broad peak is observable both at  $100 \text{ mV}\cdot\text{s}^{-1}$  and  $50 \text{ mV}\cdot\text{s}^{-1}$ . At these two rates, in the backward scan, an intense peak is observable, located at lower



potentials with respect to the peak observed during the forward scan. Overall, the behavior of the PCBM transistors gated in 4 M [Li][TFSI] in TEGDME resembles that one of analogous PCBM transistors gated with [EMIM][TFSI] (“bulk” doping as opposed to “surface-confined” doping observed with [PYR14][TFSI], see main text).

| <b>Ionic liquid<br/>[EMIM][TFSI]</b>                |                        |               |                        |                |                        |                |
|-----------------------------------------------------|------------------------|---------------|------------------------|----------------|------------------------|----------------|
| Scan rate of<br>the<br>electrochemical<br>potential | Potential<br>vs carbon | Current       | Potential<br>vs carbon | Current        | Potential<br>vs carbon | Current        |
| Cathodic scan (third cycle)                         |                        |               |                        |                |                        |                |
| 100mV/s                                             | -0.99 V                | -12.9 $\mu$ A | -1.38 V                | -39.8 $\mu$ A  | -1.67 V                | -39.7 $\mu$ A  |
| 50mV/s                                              | -1.01 V                | -9.2 $\mu$ A  | -1.35 V                | -24.86 $\mu$ A | -1.64 V                | -24.75 $\mu$ A |
| 1mV/s                                               | -0.83 V                | -0.28 $\mu$ A | -1.37 V                | -1.52 $\mu$ A  | -1.71 V                | -1.35 $\mu$ A  |
| Anodic scan (third cycle)                           |                        |               |                        |                |                        |                |
| 100mV/s                                             | -1.43 V                | 22.8 $\mu$ A  | -1.1 V                 | 21.5 $\mu$ A   | -0.57 V                | 19.8 $\mu$ A   |
| 50mV/s                                              | -1.43 V                | 13.79 $\mu$ A | -1.1 V                 | 13.78 $\mu$ A  | -0.66 V                | 11.8 $\mu$ A   |
| 1mV/s                                               | -1.5 V                 | 0.07 $\mu$ A  | -0.98 V                | 0.76 $\mu$ A   | -0.64 V                | 0.84 $\mu$ A   |
| <b>Ionic liquid<br/>[PYR14][TFSI]</b>               |                        |               |                        |                |                        |                |
| Cathodic scan (third cycle)                         |                        |               |                        |                |                        |                |
| 100mV/s                                             | -0.99 V                | -1.94 $\mu$ A | -1.35 V                | -3.80 $\mu$ A  | -1.62 V                | -3.92 $\mu$ A  |
| 50mV/s                                              | -1.04 V                | -1.78 $\mu$ A | -1.37V                 | -3.55 $\mu$ A  | -1.64V                 | -3.87 $\mu$ A  |
| 1mV/s                                               | -0.95 V                | -0.17 $\mu$ A | -1.33 V                | -0.79 $\mu$ A  | -1.72V                 | -0.94 $\mu$ A  |
| Anodic scan (third cycle)                           |                        |               |                        |                |                        |                |
| 100mV/s                                             | -1.49 V                | 1.82 $\mu$ A  | -1.05 V                | 2.64 $\mu$ A   | -0.67 V                | 4.99 $\mu$ A   |
| 50mV/s                                              | -1.51 V                | 1.88 $\mu$ A  | -1.11 V                | 2.77 $\mu$ A   | -0.67 V                | 4.65 $\mu$ A   |
| 1mV/s                                               | -1.58 V                | 0.24 $\mu$ A  | -1.24 V                | 0.34 $\mu$ A   | -0.72 V                | 0.92 $\mu$ A   |

Table S1. Cathodic and anodic current peak positions extracted at different scan rates, 100 mVs<sup>-1</sup>, 50 mVs<sup>-1</sup>, and 1 mVs<sup>-1</sup>, for PCBM films in transistor configuration (see main text) in different ionic liquids, specified in the Table.
